# Supplementary material for: Novel multidisciplinary hub-and-spoke tertiary service for the management of severe acute pancreatitis
Source: PubMed Central journal article supplement — BMJ Open Gastroenterol. 2021 Mar 31;8(1):e000501. doi: 10.1136/bmjgast-2020-000501 (PMC8016076; doi:10.1136/bmjgast-2020-000501), 2021-03-31
Supplement: bmjgast-2020-000501supp001.pdf [file bmjgast-2020-000501supp001.pdf]

**THE NORTH OF ENGLAND HEPATO-PANCREATICO-BILIARY CENTRE**  
**SAP-RC PATIENT PROFORMA**

|                              |  |                              |  |
|------------------------------|--|------------------------------|--|
| <i>Patient Name:</i>         |  | <i>Admission date:</i>       |  |
| <i>Date of birth:</i>        |  | <i>Discharge date:</i>       |  |
| <i>MRN:</i>                  |  | <i>Hospital &amp; Ward:</i>  |  |
| <i>NHS number:</i>           |  | <i>Ward contact:</i>         |  |
| <i>Referral date:</i>        |  | <i>Referring Consultant:</i> |  |
| <i>Allocated Consultant:</i> |  | <i>Clinician contact:</i>    |  |
| <i>Admission reason:</i>     |  | <i>Aetiology:</i>            |  |
| <i>Past Medical History:</i> |  | <i>Medications:</i>          |  |
| <i>Question for MDT:</i>     |  | <i>Other info:</i>           |  |

| <b>Bloods:</b>       | <b>Admission</b>             |                  |  |  | <b>Bloods:</b>       | <b>Admission</b> |  |  |             |
|----------------------|------------------------------|------------------|--|--|----------------------|------------------|--|--|-------------|
| <i>Amylase</i>       |                              |                  |  |  | <i>CRP</i>           |                  |  |  |             |
| <i>Sodium</i>        |                              |                  |  |  | <i>WCC</i>           |                  |  |  |             |
| <i>Potassium</i>     |                              |                  |  |  | <i>RCC</i>           |                  |  |  |             |
| <i>Chloride</i>      |                              |                  |  |  | <i>Hb</i>            |                  |  |  |             |
| <i>Urea</i>          |                              |                  |  |  | <i>Haematocrit</i>   |                  |  |  |             |
| <i>Creatinine</i>    |                              |                  |  |  | <i>Platelets</i>     |                  |  |  |             |
| <i>eGFR</i>          |                              |                  |  |  | <i>Neutrophils</i>   |                  |  |  |             |
| <i>Bilirubin</i>     |                              |                  |  |  | <i>PT</i>            |                  |  |  |             |
| <i>Total Protein</i> |                              |                  |  |  | <i>APTT</i>          |                  |  |  |             |
| <i>Albumin</i>       |                              |                  |  |  | <i>Fibrinogen</i>    |                  |  |  |             |
| <i>ALT</i>           |                              |                  |  |  | <i>Blood culture</i> |                  |  |  |             |
| <i>ALP</i>           |                              |                  |  |  |                      |                  |  |  |             |
| <i>Gamma GT</i>      |                              |                  |  |  |                      |                  |  |  |             |
| <i>Globulins</i>     |                              |                  |  |  |                      |                  |  |  |             |
| <i>Calcium</i>       |                              |                  |  |  |                      |                  |  |  |             |
| <i>Adjusted Ca</i>   |                              |                  |  |  |                      |                  |  |  |             |
| <i>Phosphate</i>     |                              |                  |  |  |                      |                  |  |  |             |
| <i>Mg</i>            |                              |                  |  |  |                      |                  |  |  |             |
| <i>Date:</i>         | <i>Imaging/Procedures:</i>   | <i>Findings:</i> |  |  |                      |                  |  |  | <i>PACS</i> |
|                      |                              |                  |  |  |                      |                  |  |  |             |
|                      |                              |                  |  |  |                      |                  |  |  |             |
|                      |                              |                  |  |  |                      |                  |  |  |             |
| <i>Date:</i>         | <i>Updates/MDM Outcomes:</i> |                  |  |  |                      |                  |  |  |             |
| <i>REFERRAL</i>      |                              |                  |  |  |                      |                  |  |  |             |
| <i>UPDATE</i>        |                              |                  |  |  |                      |                  |  |  |             |
| <i>OUTCOME</i>       |                              |                  |  |  |                      |                  |  |  |             |
