# Supplementary material for: Novel multidisciplinary hub-and-spoke tertiary service for the management of severe acute pancreatitis
Source: PubMed Central journal article supplement — BMJ Open Gastroenterol. 2021 Mar 31;8(1):e000501. doi: 10.1136/bmjgast-2020-000501 (PMC8016076; doi:10.1136/bmjgast-2020-000501), 2021-03-31
Supplement: bmjgast-2020-000501supp002.pdf [file bmjgast-2020-000501supp002.pdf]

November 25, 2020

To,

**Professor R Mark Beattie,**

**Editor in Chief,**

**BMJ Open Gastroenterology**

**Revised submission: A novel multidisciplinary hub and spoke tertiary service for the management of severe acute pancreatitis**

Dear Professor Beattie,

We are extremely grateful to BMJ Open Gastroenterology editorial board for giving us this opportunity to resubmit the revised manuscript.

I have made all the changes suggested by the reviewers. In addition, I have separately answered the comments by the reviewers.

Thanking you in anticipation

Kind regards

Manu Nayar

Consultant Gastroenterologist & Pancreatobiliary Physician

Honorary Clinical Lecturer - Translational & Clinical Research Institute, Newcastle University

President – UK & Ireland EUS Society – [www.ukieus.co.uk](http://www.ukieus.co.uk)

Director – Endoscopy Training Centre

Freeman Hospital, Newcastle upon Tyne, U.K

00441912448755
